# Supplementary material for: Influence of NOS3 rs2070744 genotypes on hepatocellular carcinoma patients treated with lenvatinib
Source: PubMed Central journal article supplement (PMC7553969; doi:10.1038/s41598-020-73930-3), 2020-10-13
Supplement: 41598_2020_73930_MOESM1_ESM.pdf [file 41598_2020_73930_MOESM1_ESM.pdf]

## **Influence of NOS3 rs2070744 genotypes on hepatocellular carcinoma patients treated with lenvatinib**

Shintaro Azuma,<sup>1,2</sup> Haruki Uojima,<sup>3,4</sup> Makoto Chuma,<sup>5</sup> Xue Shao,<sup>3</sup> Hisashi Hidaka,<sup>3</sup>  
Takahide Nakazawa,<sup>3,6</sup> Masaaki Kondo,<sup>7</sup> Kazushi Numata,<sup>5</sup> Shogo Iwabuchi,<sup>8</sup> Makoto  
Kako,<sup>4</sup> Shin Maeda,<sup>7</sup> Wasaburo Koizumi,<sup>3</sup> and Koichiro Atsuda<sup>1,9</sup>

1. Department of Pharmacy, Kitasato University Hospital, 1-15-1 Kitasato, Minami-ku, Sagamihara, Kanagawa, 252-0375, Japan
2. Graduate School of Pharmaceutical Sciences, Kitasato University, 5-9-1 Shirokane, Minato-ku, Tokyo, 108-8641, Japan
3. Department of Gastroenterology, Internal Medicine, Kitasato University School of Medicine, 1-15-1 Kitasato, Minami-ku, Sagamihara, Kanagawa, 252-0374, Japan
4. Gastroenterology Medicine Center, Shonan Kamakura General Hospital, 1370-1 Okamoto, Kamakura, Kanagawa, 247-8533, Japan
5. Gastroenterological Center, Yokohama City University Medical Center, 4-57 Urahane, Minami-ku, Yokohama, Kanagawa, 232-0024, Japan
6. Nakazawa Internal Medicine Clinic, 4-14-18 Sagamidai, Minami-ku, Sagamihara, Kanagawa, 252-0321, Japan
7. Department of Gastroenterology, Yokohama City University Hospital, 3-9 Fukuura, Kanazawa-ku, Yokohama, Kanagawa, 236-0004, Japan
8. Hepato-Biliary-Pancreatic Center, Shonan Fujisawa Tokushukai Hospital, 1-5-1 Tsujidokandai, Fujisawa, Kanagawa, 251-0041, Japan
9. School of Pharmaceutical Sciences, Kitasato University, 5-9-1 Shirokane, Minato-ku, Tokyo, 108-8641, Japan

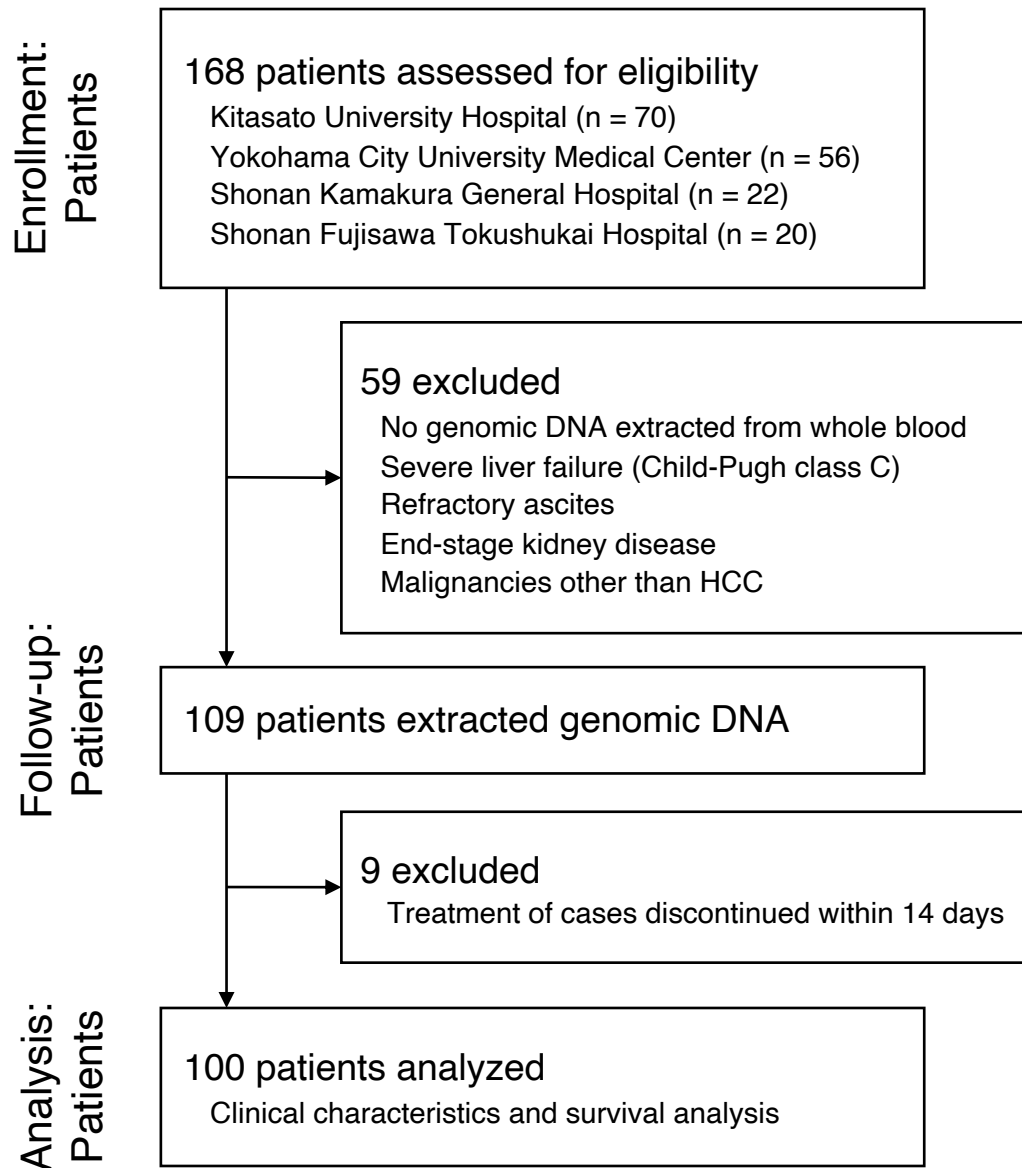

**Supplementary Figure S1. Trial profile**

**Supplementary Table S1.** Univariate analysis for baseline prognostic factors for progression-free survival and overall survival

| Variable                                               | Category                 | Progression-free survival |          | Overall survival  |          |
|--------------------------------------------------------|--------------------------|---------------------------|----------|-------------------|----------|
|                                                        |                          | HR (95% CI)               | <i>p</i> | HR (95% CI)       | <i>p</i> |
| AFP, ng/mL                                             | < 200 vs. ≥ 200          | 1.57 (0.95–2.60)          | 0.081    | 3.44 (1.47–8.08)  | 0.004    |
| AFP, ng/mL                                             | < 400 vs. ≥ 400          | 1.50 (0.90–2.51)          | 0.119    | 3.12 (1.35–7.23)  | 0.008    |
| ALBI grade                                             | Grade 1 vs. Grade ≥ 2    | 1.35 (0.82–2.22)          | 0.244    | 1.52 (0.64–3.60)  | 0.338    |
| Age, years                                             | < 65 vs. ≥ 65            | 1.35 (0.76–2.41)          | 0.311    | 0.72 (0.29–1.77)  | 0.473    |
| Age, years                                             | < 75 vs. ≥ 75            | 1.04 (0.62–1.72)          | 0.889    | 1.24 (0.53–2.93)  | 0.618    |
| BCLC staging system                                    | Stage B vs. Stage C      | 0.99 (0.61–1.62)          | 0.975    | 1.55 (0.66–3.64)  | 0.314    |
| BMI, kg/m <sup>2</sup>                                 | < 21 vs. ≥ 21            | 1.39 (0.77–2.52)          | 0.279    | 2.08 (0.62–7.04)  | 0.238    |
| Body weight, kg                                        | < 60 vs. ≥ 60            | 1.19 (0.72–1.97)          | 0.506    | 1.63 (0.67–4.02)  | 0.284    |
| Child-Pugh system                                      | Class A vs. Class B      | 1.91 (1.06–3.44)          | 0.031    | 2.91 (1.22–6.95)  | 0.016    |
| ECOG-PS                                                | 0 vs. 1                  | 0.79 (0.25–2.52)          | 0.685    | N/A               | N/A      |
| Etiology of HCC:                                       |                          |                           |          |                   |          |
| Non-alcoholic steatohepatitis                          | no vs. yes               | 1.04 (0.57–1.88)          | 0.905    | 0.79 (0.27–2.33)  | 0.665    |
| Etiology of HCC: Alcohol use                           | no vs. yes               | 0.77 (0.37–1.63)          | 0.495    | 3.64 (1.45–9.16)  | 0.006    |
| Etiology of HCC: Hepatitis B                           | no vs. yes               | 1.64 (0.90–2.98)          | 0.106    | 0.68 (0.20–2.31)  | 0.542    |
| Etiology of HCC: Hepatitis C                           | no vs. yes               | 0.66 (0.39–1.12)          | 0.121    | 0.57 (0.22–1.46)  | 0.242    |
| Extrahepatic spread present                            | no vs. yes               | 0.67 (0.38–1.18)          | 0.163    | 0.87 (0.35–2.17)  | 0.768    |
| FGFR4 rs351855 genotype                                | CT/TT vs. CC             | 1.17 (0.70–1.94)          | 0.553    | 1.02 (0.43–2.44)  | 0.963    |
| Hepatic ascites                                        | no vs. yes               | 1.60 (0.85–3.01)          | 0.146    | 4.40 (1.82–10.62) | 0.001    |
| Hepatic encephalopathy                                 | no vs. yes               | 1.70 (0.68–4.25)          | 0.258    | 1.77 (0.41–7.58)  | 0.443    |
| Intrahepatic lesion                                    | no vs. yes               | 0.33 (0.10–1.09)          | 0.069    | N/A               | N/A      |
| Macroscopic PVI, extrahepatic spread, or both, present | no vs. yes               | 0.90 (0.55–1.50)          | 0.699    | 1.50 (0.65–3.49)  | 0.345    |
| Macroscopic PVI present                                | no vs. yes               | 1.71 (0.93–3.14)          | 0.084    | 3.89 (1.60–9.49)  | 0.003    |
| Maximum tumor size, cm                                 | ≤ 5 vs. > 5              | 1.26 (0.74–2.14)          | 0.397    | 2.70 (1.15–6.33)  | 0.022    |
| NOS3 rs2070744 + FGFR4 rs351855 genotypes              | Others vs. TC/CC + CT/TT | 2.56 (1.28–5.09)          | 0.008    | 3.36 (1.21–9.29)  | 0.020    |
| NOS3 rs2070744 genotype                                | TC/CC vs. TT             | 0.60 (0.34–1.05)          | 0.073    | 0.46 (0.19–1.11)  | 0.083    |
| Number of tumors                                       | < 4 vs. ≥ 4              | 0.91 (0.56–1.48)          | 0.701    | 1.26 (0.54–2.93)  | 0.588    |
| PIVKA-II, mAU/mL                                       | < 100 vs. ≥ 100          | 1.00 (0.57–1.77)          | 0.988    | 1.22 (0.45–3.31)  | 0.696    |
| Portal vein invasion                                   | VP 0–3 vs. VP ≥ 4        | 1.13 (0.45–2.85)          | 0.789    | 1.44 (0.33–6.24)  | 0.622    |
| RDI at 56 days, %                                      | ≥ 70 vs. < 70            | 1.09 (0.65–1.82)          | 0.745    | 1.28 (0.53–3.10)  | 0.588    |
| RDI at 56 days, %                                      | ≥ 75 vs. < 75            | 1.06 (0.64–1.77)          | 0.818    | 1.09 (0.45–2.64)  | 0.847    |
| RDI at 56 days, %                                      | ≥ 80 vs. < 80            | 1.00 (0.60–1.66)          | 0.988    | 0.83 (0.34–2.01)  | 0.682    |
| Sex                                                    | female vs. male          | 1.10 (0.64–1.89)          | 0.722    | 2.09 (0.71–6.17)  | 0.184    |
| Tumor liver occupying rate, %                          | < 50 vs. ≥ 50            | 1.03 (0.37–2.87)          | 0.948    | 1.92 (0.45–8.26)  | 0.381    |
| UICC-TNM staging system                                | I and II vs. III and IV  | 0.96 (0.54–1.72)          | 0.899    | 1.19 (0.40–3.53)  | 0.750    |
| Up-to-seven criteria                                   | within vs. beyond        | 1.02 (0.62–1.68)          | 0.945    | 1.68 (0.73–3.91)  | 0.224    |

AFP α-fetoprotein, ALBI albumin-bilirubin, BCLC Barcelona Clinic Liver Cancer, BMI body mass index, BSC best supportive care, CI confidence interval, ECOG-PS Eastern Cooperative Oncology Group-Performance Status, FGFR4 fibroblast growth factor receptor 4, HCC hepatocellular carcinoma, HR hazard ratio, N/A not available, NOS3 nitric oxide synthase 3, PIVKA-II protein induced by vitamin K absence or antagonist II, PVI portal vein invasion, RDI relative dose intensity, UICC-TNM Union for International Cancer Control-Tumor, Nodes, Metastasis.

**Supplementary Table S2.** Treatment-related adverse events occurring in either group

| Adverse event, n (%)     | N  | All (N = 100) |         | <i>NOS3 rs2070744</i> |         |                  |         | <i>FGFR4 rs351855</i> |         |                  |         |
|--------------------------|----|---------------|---------|-----------------------|---------|------------------|---------|-----------------------|---------|------------------|---------|
|                          |    |               |         | TT (n = 76)           |         | TC + CC (n = 24) |         | CC (n = 37)           |         | CT + TT (n = 63) |         |
|                          |    | Grade ≤ 2     | Grade 3 | Grade ≤ 2             | Grade 3 | Grade ≤ 2        | Grade 3 | Grade ≤ 2             | Grade 3 | Grade ≤ 2        | Grade 3 |
| Any adverse event        | 76 | 73 (96)       | 43 (57) | 55 (72)               | 33 (43) | 18 (75)          | 10 (42) | 28 (76)               | 16 (43) | 45 (71)          | 27 (43) |
| Anorexia                 | 59 | 42 (71)       | 17 (29) | 30 (39)               | 13 (17) | 12 (50)          | 4 (17)  | 18 (49)               | 7 (19)  | 24 (38)          | 10 (16) |
| Fatigue                  | 55 | 54 (98)       | 1 (2)   | 39 (51)               | 1 (1)   | 15 (63)          | 0       | 22 (59)               | 0       | 32 (48)          | 1 (2)   |
| PPE                      | 47 | 45 (96)       | 2 (4)   | 31 (41)               | 1 (1)   | 14 (58)          | 1 (4)   | 19 (51)               | 0       | 26 (32)          | 2 (3)   |
| Abdominal pain           | 41 | 38 (93)       | 3 (7)   | 26 (34)               | 3 (4)   | 12 (50)          | 0       | 13 (35)               | 1 (3)   | 25 (40)          | 2 (3)   |
| Diarrhea                 | 41 | 37 (90)       | 4 (10)  | 25 (33)               | 3 (4)   | 12 (50)          | 1 (4)   | 15 (41)               | 3 (8)   | 22 (35)          | 1 (2)   |
| Dysgeusia                | 36 | 36 (100)      | 0       | 26 (34)               | 0       | 10 (42)          | 0       | 13 (35)               | 0       | 23 (37)          | 0       |
| Edema                    | 36 | 34 (94)       | 2 (6)   | 27 (36)               | 1 (1)   | 7 (29)           | 1 (4)   | 13 (35)               | 0       | 21 (33)          | 2 (3)   |
| Anxiety                  | 35 | 32 (91)       | 3 (9)   | 23 (30)               | 3 (4)   | 9 (38)           | 0       | 9 (24)                | 2 (5)   | 23 (37)          | 1 (2)   |
| Hypertension             | 35 | 28 (80)       | 7 (20)  | 21 (28)               | 6 (8)   | 7 (29)           | 1 (4)   | 12 (32)               | 3 (8)   | 16 (25)          | 4 (6)   |
| Constipation             | 29 | 25 (86)       | 4 (14)  | 19 (25)               | 4 (5)   | 6 (25)           | 0       | 6 (16)                | 3 (8)   | 19 (30)          | 1 (2)   |
| Nausea/vomiting          | 27 | 26 (96)       | 1 (4)   | 21 (28)               | 1 (1)   | 5 (21)           | 0       | 13 (35)               | 0       | 13 (21)          | 1 (2)   |
| Palpitations             | 27 | 25 (93)       | 2 (7)   | 19 (25)               | 2 (3)   | 6 (25)           | 0       | 9 (24)                | 2 (5)   | 16 (25)          | 0       |
| Rash                     | 26 | 26 (100)      | 0       | 17 (22)               | 0       | 9 (38)           | 0       | 10 (27)               | 0       | 16 (25)          | 0       |
| Mucositis oral           | 24 | 22 (92)       | 2 (8)   | 13 (17)               | 2 (3)   | 9 (38)           | 0       | 9 (24)                | 1 (3)   | 13 (21)          | 1 (2)   |
| Proteinuria              | 20 | 13 (65)       | 7 (35)  | 9 (12)                | 6 (8)   | 4 (17)           | 1 (4)   | 7 (19)                | 1 (3)   | 6 (10)           | 6 (10)  |
| Peripheral neuropathy    | 19 | 19 (100)      | 0       | 14 (18)               | 0       | 5 (21)           | 0       | 6 (16)                | 0       | 13 (21)          | 0       |
| Nail change              | 13 | 13 (100)      | 0       | 11 (14)               | 0       | 2 (8)            | 0       | 3 (8)                 | 0       | 10 (16)          | 0       |
| Eye disorders            | 12 | 12 (100)      | 0       | 8 (11)                | 0       | 4 (17)           | 0       | 4 (11)                | 0       | 8 (13)           | 0       |
| Hypothyroidism           | 11 | 11 (100)      | 0       | 9 (12)                | 0       | 2 (8)            | 0       | 2 (5)                 | 0       | 9 (14)           | 0       |
| Paronychia               | 7  | 7 (100)       | 0       | 6 (8)                 | 0       | 1 (4)            | 0       | 0                     | 0       | 7 (11)           | 0       |
| Ascites                  | 6  | 2 (33)        | 4 (67)  | 2 (3)                 | 4 (5)   | 0                | 0       | 1 (3)                 | 3 (8)   | 1 (2)            | 1 (2)   |
| Fever                    | 6  | 6 (100)       | 0       | 3 (4)                 | 0       | 3 (13)           | 0       | 4 (11)                | 0       | 2 (3)            | 0       |
| Platelet count decreased | 6  | 4 (67)        | 2 (33)  | 3 (4)                 | 2 (3)   | 1 (4)            | 0       | 0                     | 0       | 4 (6)            | 2 (3)   |

*FGFR4* fibroblast growth factor receptor 4, *NOS3* nitric oxide synthase 3, *PPE* palmar-plantar erythrodysesthesia.

**Supplementary Table S3.** Chromosome, positions and biological effect of studied single-nucleotide polymorphisms

| Gene         | Gene name                           | SNP       | TaqMan catalog number | Chr | Position  | Functional consequence | Amino acid change |
|--------------|-------------------------------------|-----------|-----------------------|-----|-----------|------------------------|-------------------|
| <b>NOS3</b>  | Nitric oxide synthase 3             | rs2070744 | C_15903863_10         | 7   | 150992991 | Intron variant         | N/A               |
|              |                                     | rs2912791 | C_16166432_10         | 10  | 121559447 | Intron variant         | N/A               |
| <b>FGFR2</b> | Fibroblast growth factor receptor 2 | rs2981429 | C_2917349_10          | 10  | 121552460 | Intron variant         | N/A               |
|              |                                     | rs2981582 | C_2917302_10          | 10  | 121592803 | Intron variant         | N/A               |
| <b>FGFR4</b> | Fibroblast growth factor receptor 4 | rs351855  | C_3166614_10          | 5   | 177093242 | Missense variant       | Gly388Arg         |

*Arg* arginine, *Chr* chromosome, *Gly* glycine, *N/A* not available, *SNP* single-nucleotide polymorphism.
